# Supplementary material
Source: PubMed Central journal article supplement (PMC2757972)
Supplement: supp_M109.023846_jbc.M109.023846-1.pdf [file supp_M109.023846_jbc.M109.023846-1.pdf]

**Supplementary Table 1. Plasma and hepatic TG FA composition of 36 wk old mice**

|                | Pcyt2 plasma (n=4 per group) |                   |                 | Pcyt2 liver (n=5 per group) |                   |                 |
|----------------|------------------------------|-------------------|-----------------|-----------------------------|-------------------|-----------------|
|                | +/+                          | +/-               | <i>P</i> -value | +/+                         | +/-               | <i>P</i> -value |
| C14:0          | 4.02±1.65                    | 5.15±1.42         | 0.165           | 1.29±0.47                   | 1.32±0.47         | 0.905           |
| C15:0          | 3.98±1.9                     | 5.67±1.73         | 0.085           | 0.44±0.36                   | 0.36±0.25         | 0.642           |
| C16:0          | 28.37±5.81                   | 26.04±5.31        | 0.418           | 22.66±3.32                  | 25.71±2.75        | 0.141           |
| C18:0          | 4.82±2.83                    | 5.55±0.83         | 0.503           | 2.27±0.81                   | 2.16±0.68         | 0.812           |
| <b>C18:1</b>   | <b>8.97±4.47</b>             | <b>18.69±8.99</b> | <b>*0.036</b>   | <b>37.1±5.43</b>            | <b>43.76±3.94</b> | <b>*0.038</b>   |
| <b>C18:2n6</b> | <b>10.98±1.27</b>            | <b>6.91±3.9</b>   | <b>0.061</b>    | <b>20.45±6.26</b>           | <b>13.19±3.05</b> | <b>*0.039</b>   |
| C18:3n6        | 0.26±0.27                    | 0.73±0.88         | 0.184           | 0.52±0.29                   | 0.27±0.14         | 0.129           |
| C18:3n3        | 1.13±0.83                    | 0.53±0.33         | 0.089           | 0.69±0.46                   | 0.45±0.38         | 0.349           |
| C18:4n3        | 0.73±0.55                    | 0.55±0.43         | 0.515           | 0.42±0.4                    | 0.28±0.41         | 0.549           |
| C20:1          | 3.24±1.85                    | 4.33±4.07         | 0.504           | 1.32±0.56                   | 1.43±0.54         | 0.723           |
| C20:2n6        | 0.51±0.22                    | 1.19±0.99         | 0.095           | 0.22±0.11                   | 0.33±0.23         | 0.326           |
| C20:3n6        | <b>2.4±0.86</b>              | <b>1.1±0.52</b>   | <b>*0.003</b>   | 0.63±0.45                   | 0.52±0.25         | 0.620           |
| C20:4n6        | 2.02±2.05                    | 0.92±0.73         | 0.185           | 1.49±0.99                   | 1.24±0.63         | 0.616           |
| SFA            | 45.46±5.83                   | 43.18±11.82       | 0.635           | 26.85±3.2                   | 29.91±2.56        | 0.124           |
| <b>MUFA</b>    | <b>28.56±3.45</b>            | <b>39.81±12.8</b> | <b>*0.043</b>   | <b>44.11±4.85</b>           | <b>51.41±4.43</b> | <b>*0.021</b>   |
| <b>PUFA</b>    | <b>23.48±4.94</b>            | <b>18.27±2.54</b> | <b>*0.023</b>   | 26.2±8.07                   | 18.68±5.41        | 0.091           |
| Omega-3        | 5.63±1.41                    | 4.23±1.56         | 0.081           | 1.94±1.17                   | 1.36±0.56         | 0.309           |
| Omega-6        | <b>17.85±4.21</b>            | <b>14.03±2.2</b>  | <b>*0.045</b>   | 22.59±8.79                  | 17.32±0.43        | 0.235           |

SFA-Saturated FA; MUFA- monounsaturated FA and PUFA- polyunsaturated FA.

\* Represents a significant difference ( $P<0.05$ ) compared to littermate control (data represent percent of total FA content).
