# Supplementary material
Source: PubMed Central journal article supplement (PMC2757972)

Figure S1

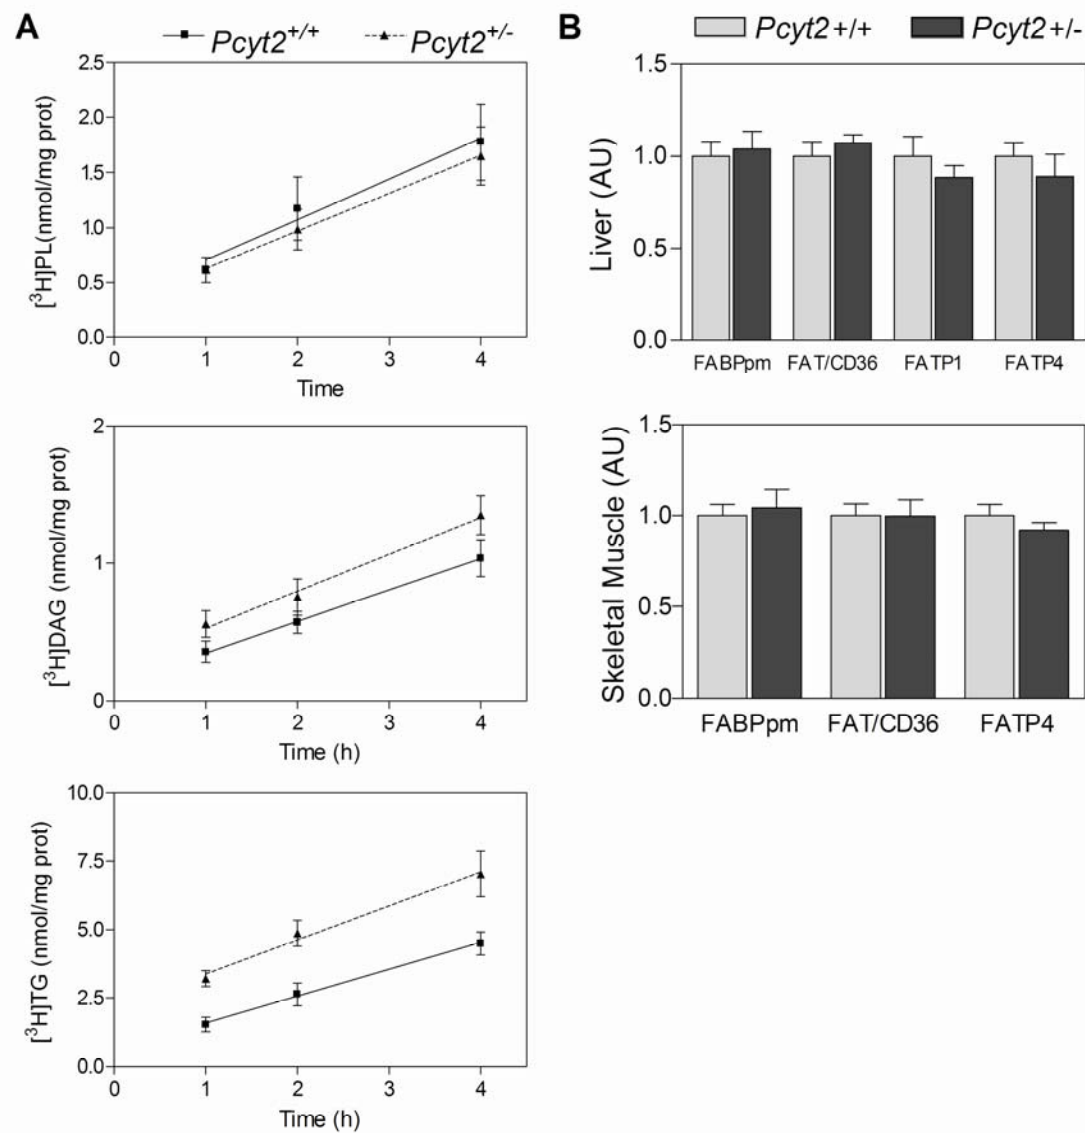

Supplement: supp_M109.023846_jbc.M109.023846-2.pdf [file supp_M109.023846_jbc.M109.023846-2.pdf]
